# Supplementary figures and images for: Hidden synaptic differences in a neural circuit underlie differential behavioral susceptibility to a neural injury
Source: eLife journal article supplement (doi:10.7554/elife.02598), 2014-06-11

Figure 8 – figure supplement 1

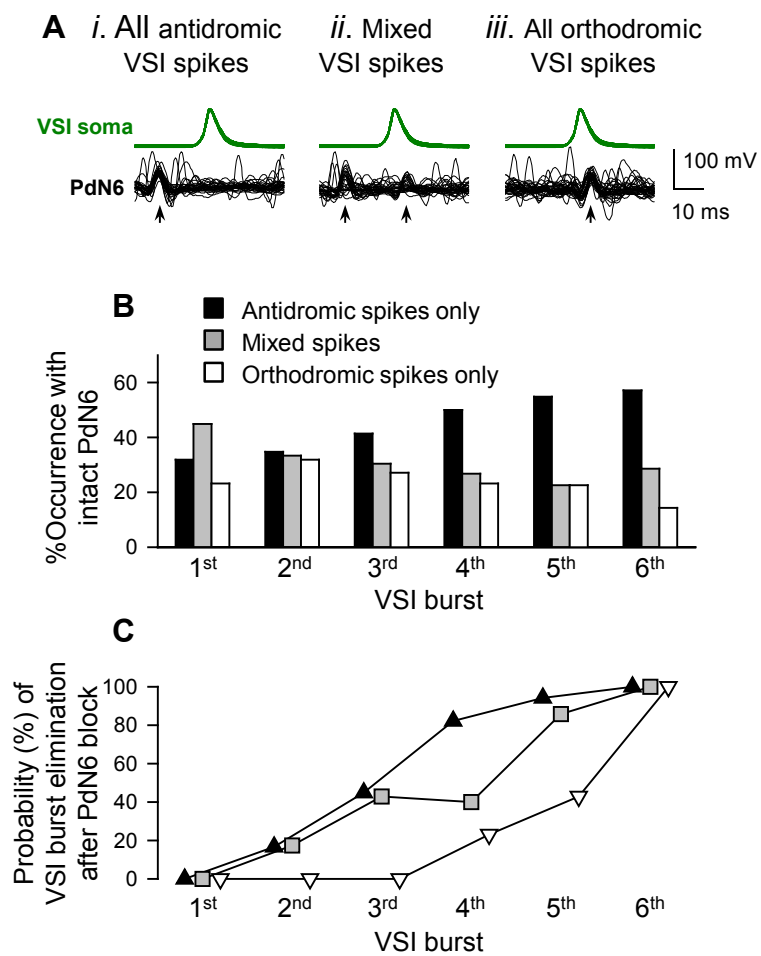

Supplement: supp [file elife-02598-supp-v1.zip]

Figure 7 – figure supplement 1

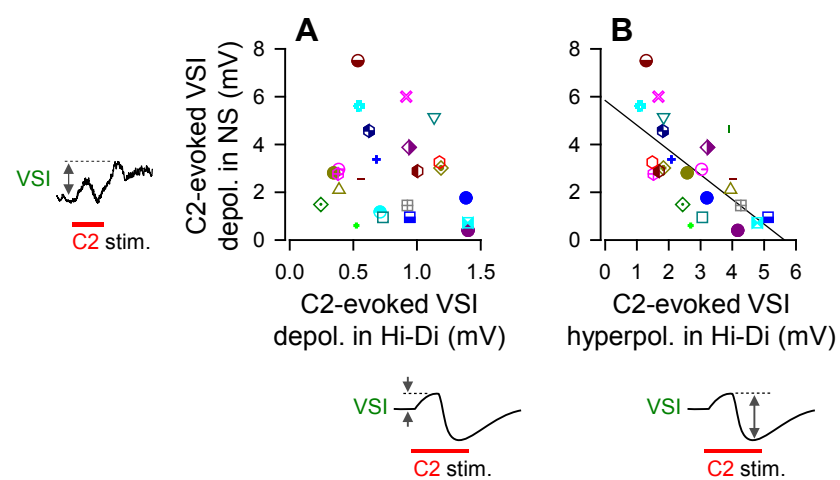

Supplement: supp [file elife-02598-supp-v1.zip]

Figure 6 – figure supplement 1

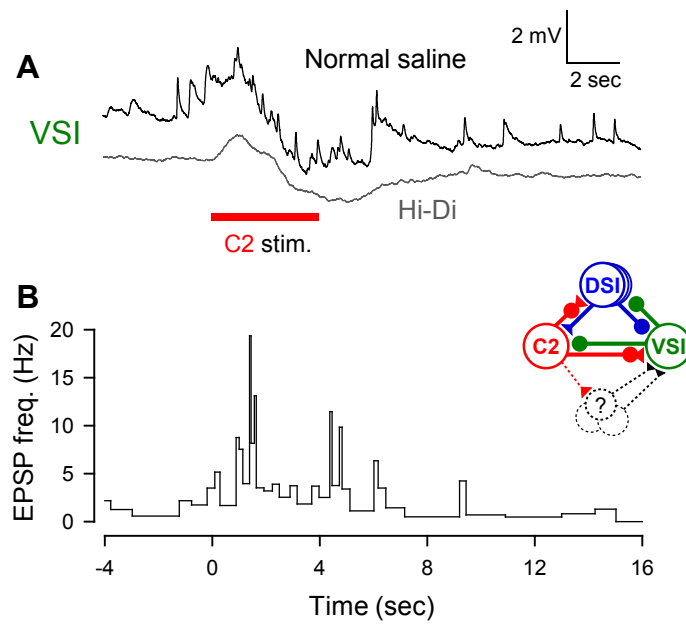

Supplement: supp [file elife-02598-supp-v1.zip]
